# Supplementary material for: Deciphering the role of nuclear and cytoplasmic IKKα in skin cancer
Source: PubMed Central journal article supplement (PMC5045415; doi:10.18632/oncotarget.8792), 2016-04-18
Supplement: oncotarget-07-29531-s001.pdf [file oncotarget-07-29531-s001.pdf]

## Deciphering the role of nuclear and cytoplasmic IKK $\alpha$ in skin cancer

### SUPPLEMENTARY MATERIAL

#### Supplementary data

Identification of each tumor and mouse corresponding to every lane. Information about tumors and mice analyzed in the Figure 6. t=tumor; m=mouse.

(A) Lanes 1-3, N-IKK $\alpha$  mice; lanes 4-6, Control mice; lanes 7-9, C-IKK $\alpha$  mice. t= tumor; m= mouse. Lane 1, t 7, m A658; lane 2, t 10, m A658; lane 3, t 11, m A658; lane 4, t 1, m A633; lane 5, t 4, m A633; lane 6, t 3, m A654; lane 7, t 1, m A645; lane 8, t 9, m A688; lane 9, t 10, m A694.

(B) Lanes 1-3, N-IKK $\alpha$  mice; lanes 4-6, C-IKK $\alpha$  mice; lanes 7-9, Control mice. t= tumor; m= mouse. Lane 1, t 5, m A629; lane 2, t 14, m A653; lane 3, t 13, m A659; lane 4, t 2, m A643; lane 5, t 4, m A643; lane 6, t 8, m A632; lane 7, t 6, m A693; lane 8, t 10, m A693; lane 9, t 24, m A693.

(C) Lanes 1-3, N-IKK $\alpha$  mice; lanes 4-6, C-IKK $\alpha$  mice; lanes 7-9, Control mice. t= tumor; m= mouse. Lane 1, t 5+t6, m A653; lane 2, t 10, m A658; lane

3, t 11, m A658; lane 4, t 4, m A643; lane 5, t 9, m A688; lane 6, t 1, m A694; lane 7, t 1, m A633; lane 8, t 4, m A633; lane 9, t 10, m A654.

(D) Lanes 1-5, C-IKK $\alpha$  mice; lanes 6-8, Control mice. t= tumor; m= mouse. Lane 1, t 6492, m A652; lane 2, t 6493, m A652; lane 3, t4, m A652; lane 4, t 1, m A694; lane 5, t 1, m A633; lane 6, t 4, m A633; lane 7, t 10, m A633; lane 8, t 1, m A654.

(E) Lanes 1-3, N-IKK $\alpha$  mice; lanes 4-6, Control mice. t= tumor; m= mouse. Lane 1, t 11, m A658; lane 2, t 5+t 6, m A653; lane 3, t 15+t 17, m A653; lane 4, t 7, m A633; lane 5, t 6506, m A648; lane 6, t 31, m A693.

(F) Lanes 1-3, N-IKK $\alpha$  mice; lanes 4-6, Control mice; lanes 7-9, C-IKK $\alpha$  mice. t= tumor; m= mouse. Lane 1, t 7, m A658; lane 2, t 10, m A658; lane 3, t 11, m A658; lane 4, t 1, m A633; lane 5, t 4, m A633; lane 6, t 3, m A654; lane 7, t 1, m A645; lane 8, t 9, m A688; lane 9, t 10, m A694.

## SUPPLEMENTARY FIGURES

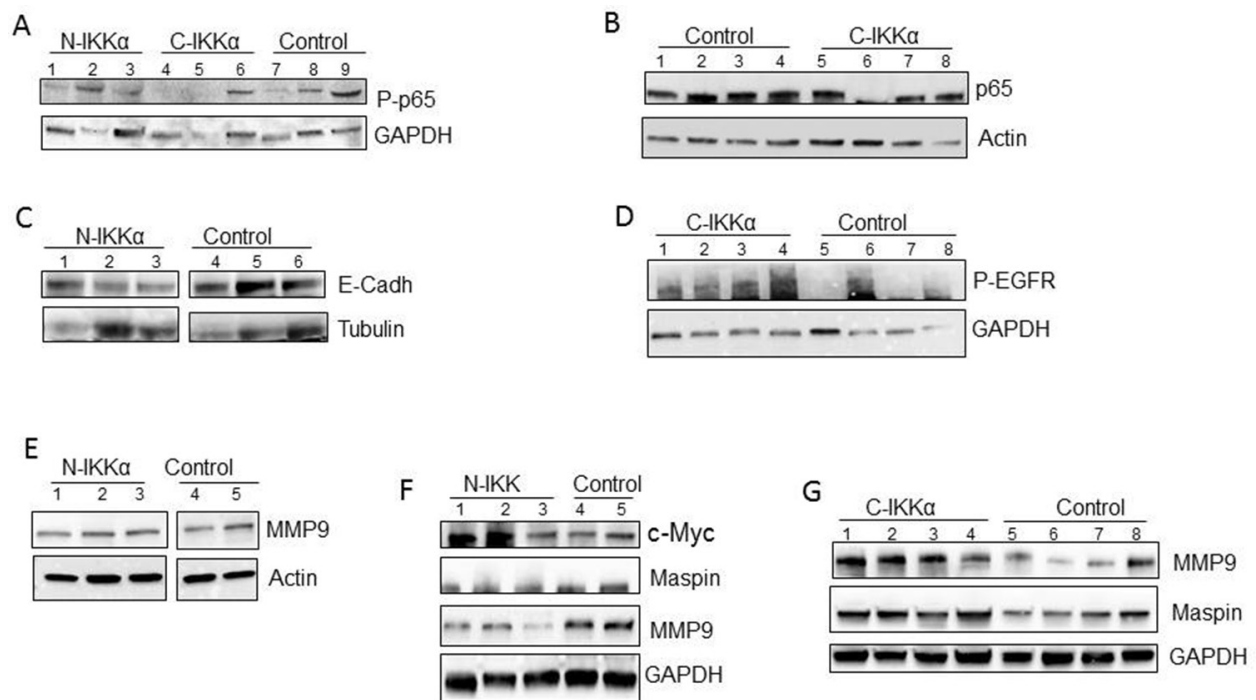

**Supplementary Figure S1: Western blot analysis of proteins in Control, C-IKK $\alpha$  and N-IKK $\alpha$  tumors.** Actin, Tubulin or GAPDH were used as loading controls. Tumor and mouse corresponding to every lane (t, tumor; m=mouse): **A.** Lanes 1-3, N-IKK $\alpha$  mice; lanes 4-6, C-IKK $\alpha$  mice; 7-9, Control tumors. t= tumor; m= mouse. Lane 1, t 11, m A658; lane 2, t 5+t 6, m A653; lane 3, t 5, m A629; lane 4, t 4, m A643; lane 5, t 9, A688; lane 6, t 6492, m A652; lane 7, t 4, m A633; lane 8, t 1, m A654; lane 9, t 31, m A693. **B.** Lanes 1-4, Control mice; lanes 5-8, C-IKK $\alpha$  mice. t= tumor; m= mouse. Lane 1, t 6520, m A627; lane 2, t 6499, m A648; lane 3, t 1, m A648; lane 4, t2, m A648; lane 5, t 6489, m A652; lane 6, t 6490, m A652; lane 7, t 1, m A652; lane 8, t 2, m A652. **C.** Lanes 1-3, N-IKK $\alpha$  mice; lanes 4-6, Control mice. t= tumor; m= mouse. Lane 1, t 11, m A658; lane 2, t 5+t 6, m A653; lane 3, t 5, m A629; lane 4, t 4, m A633; lane 5, t 1, m A654; lane 6, t 31, m A693. **D.** Lanes 1-4, C-IKK $\alpha$  mice; lanes 5-8, Control mice. t= tumor; m= mouse. Lane 1, t 4, m A643; lane 2, t 1, m A694; lane 3, t 9, m A688; lane 4, t 1, m A694; lane 5, t 1, m A654; lane 6, t 10, m A633; lane 7, t 4, m A633; lane 8, t 21, m A645. **E.** Lanes 1-3, N-IKK $\alpha$  mice; lanes 4,5, Control mice. t= tumor; m= mouse. Lane 1, t 5, m A629; lane 2, t 14, m A653; lane 3, t 13, m A659; lane 4, t 6, m A693; lane 5, t 10, m A693. **F.** Lanes 1-3, N-IKK $\alpha$  mice; lanes 4-5, Control mice. t= tumor; m= mouse. Lane 1, t 11, m A658; lane 2, t 5+t 6, m A653; lane 3, t 15+t 17, m A653; lane 4, t 7, m A633; lane 5, t 6506, m A648. **G.** Lanes 1-4, C-IKK $\alpha$  mice; lanes 5-8, Control mice. t= tumor; m= mouse. Lane 1, t 6492, m A652; lane 2, t 6493, m A652; lane 3, t4, m A652; lane 4, t 1, m A694; lane 5, t 1, m A633; lane 6, t 4, m A633; lane 7, t 10, m A633; lane 8, t 1, m A654.

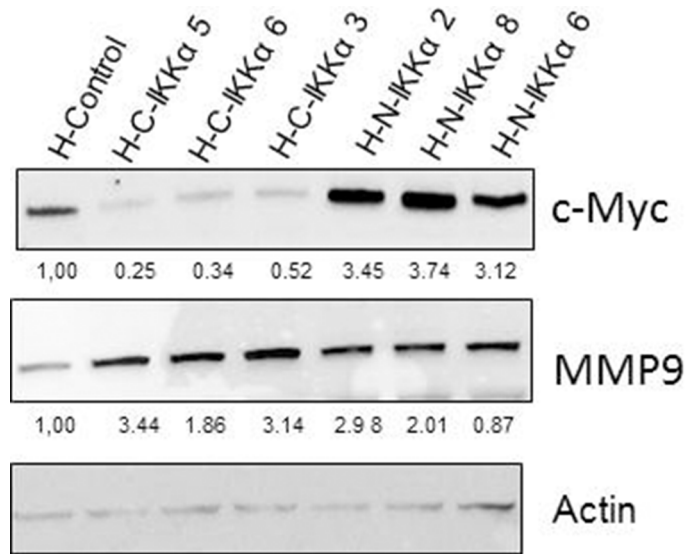

**Supplementary Figure S2:** Western blot analysis of additional HaCaT-C-IKK $\alpha$  and HaCaT-N-IKK $\alpha$  pooled clones. Actin was used as loading control.
